# Supplementary material for: Lack of Adipocytes Alters Hematopoiesis in Lipodystrophic Mice
Source: PubMed Central journal article supplement (PMC6244608; doi:10.3389/fimmu.2018.02573), 2018-11-13
Supplement: Data_Sheet_1.pdf [file Data_Sheet_1.pdf]

## Supplementary Figure Legends

### **Figure S1. Bone marrow adiposity in *Pparg*<sup>Δ/Δ</sup> and *A-ZIP*<sup>tg/+</sup> mice and their littermate controls.**

Relative mRNA levels of the adipose tissue-specific adipokine *Resistin* measured in the bones of Control (CTL, dark bars) and *Pparg*<sup>Δ/Δ</sup> (light bars) mice, left panel; and in Wild-type (WT, dark bars) and *AZIP*<sup>tg/+</sup> (light bars) mice, right panel. Mean ± SEM for 3 to 6 mice per genotype.

### **Figure S2: Characterization of the spleen organization in *Pparg*<sup>Δ/Δ</sup> mice.**

**(A)** Images of representative spleen sections stained by Haematoxylin/Eosin (top panels). White pulp (WP) areas are shown in the bottom panels as white surfaces to illustrate the method by which the surfaces have been measured. **(B)** Total spleen area, and WP areas measured from images as shown in A. The red pulp (RP) area is calculated (total section area minus the white pulp areas). Shown below is a scatter plot containing all individual WP areas (left bottom panel) demonstrating that the mean size of the individual WP areas is smaller in the *Pparg*<sup>Δ/Δ</sup> ( $\gamma^{\Delta/\Delta}$ ) mice compared to control mice (CTL). The difference in the ratio WP/RP in *Pparg*<sup>Δ/Δ</sup> ( $\gamma^{\Delta/\Delta}$ ) mice compared to control mice (CTL) is not statistically significant (right bottom panel). **(C-E)** Representative immunostainings of spleen sections showing a fairly conserved structure of this lymphoid organ. **(C)** Upper images show the distribution of B220+ B cells and CD3+ T cells with most cells localizing correctly within the B and T zone, respectively, of the WP in both strains. Lower images show the same sections stained for the extracellular matrix component laminin (in white) that demarcates the WP versus RP. **(D)** Distribution of CD11b+ and/or F4/80+ myeloid cells which localize to the RP. The WP is visualized by the staining for BP3+ fibroblasts. **(E)** IgD staining for naïve B cells showing the clustering of these cells in follicles. CD35 stains most follicular fibroblasts and many B cells. Spontaneous germinal centers are represented by IgD-CD35+ areas (arrow) that are surrounded by an IgD+ follicular mantle. Scale bar = 200μm. N=3 for each genotype.

### **Figure S3. Blood cell counts in *Pparg*<sup>Δ/Δ</sup> mice and their littermate controls.**

Blood cell counts were obtained in 12 weeks-old mice *Pparg<sup>Δ/Δ</sup>* mice and their littermate controls (CTL). MCV (Mean Corpuscular Volume); MCH (Mean Corpuscular Haemoglobin); MCHC (Mean Corpuscular Haemoglobin Concentration); RDW (Red Cell Distribution Width); MPV (Mean Platelet Volume). The results are mean ± SD for 19 control and 3 *Pparg<sup>Δ/Δ</sup>* mice.

**Figure S4. Schematic diagram of haematopoiesis.**

Schematic showing the classical developmental pathway of mature haematopoietic lineages from LT-HSC in the BM. LSK (Lineage-negative, Sca-1<sup>+</sup>,cKit-r/CD117<sup>+</sup>); LK (Lineage-negative, Sca-1<sup>-</sup>,cKit-r/CD117<sup>+</sup>); LT-HSC (Long-Term Haematopoietic Stem Cell); ST-HSC (Short-Term Haematopoietic Stem Cell); MPP (Multi-Potent Progenitor); CMP (Common Myeloid Progenitor); MEP (Megakaryocyte Erythroid Progenitor); GMP (Granulocyte Monocyte Progenitor); Mega (Megakaryocyte; CD41<sup>+</sup>); RBC (Red Blood Cell; Ter119<sup>+</sup>CD71<sup>-</sup>); Gran (Granulocyte; Gr1<sup>+</sup>CD11b<sup>+</sup>); Mac (Macrophage; Gr1<sup>-</sup>CD11b<sup>+</sup>); CLP (Common Lymphoid Progenitor; Lin-CD135<sup>+</sup>CD127<sup>+</sup>); DC (Dendritic Cell; CD11c<sup>+</sup>); NK (Natural Killer; CD3<sup>-</sup>CD161<sup>+</sup>); NKT (NK T cell; CD3<sup>+</sup>CD161<sup>+</sup>). The associated tables described the markers used for identifying the various HSC, MPP and progenitor subsets depicted.

**Figure S5. Reconstitution of mature haematopoietic subsets by donor bone marrow (BM) in the BM and spleen of chimaeras.**

**(A)** Chimeras using wild-type recipient: CD45.2<sup>+</sup> control (CTL) or *Pparg<sup>Δ/Δ</sup>* donor BM transferred into lethally irradiated WT (CD45.1<sup>+</sup>) hosts. Total numbers of CD45.2<sup>+</sup> donor-derived mature haematopoietic subsets in the BM (2 femurs and 2 tibias per mouse (top panel)) and spleen (bottom panel) of CTL (black bars) and *Pparg<sup>Δ/Δ</sup>* (grey bars) mice. Mean ± SEM for 3-4 mice per genotype. **(B)** Reverse chimeras: CD45.1<sup>+</sup> WT BM transferred into lethally irradiated CD45.2<sup>+</sup> CTL or *Pparg<sup>Δ/Δ</sup>* hosts. Total number of CD45.1<sup>+</sup> donor-derived mature haematopoietic subsets in the BM (2 femurs and 2 tibias per mouse (top panel)) and spleen (bottom panel) of control (black bars) and *Pparg<sup>Δ/Δ</sup>* (grey bars) mice. Mean ± SEM for 3-4 mice per genotype. B-cells (CD19<sup>+</sup>); T-cells (CD3<sup>+</sup>); Gran (granulocyte, Gr1<sup>+</sup>CD11b<sup>+</sup>); Macs (macrophages, Gr1<sup>-</sup>CD11b<sup>+</sup>); Ebs (erythroblasts, CD71<sup>+</sup>Ter119<sup>+</sup>).

All significant p values are indicated above the corresponding bars.

**Figure S6. Lipodystrophic A-ZIP<sup>tg/+</sup> mice have normal bone marrow (BM) but enlarged haematopoietic subsets in peripheral organs.**

**(A)** Total cell numbers in the BM (2 femurs and 2 tibias per mouse) and spleen of control WT (black bars) and A-ZIP<sup>tg/+</sup> (grey bars) mice. Mean  $\pm$  SEM for 6 mice per genotype. **(B)** Total numbers of mature haematopoietic subsets in the spleen (left panel) and BM (right panel) of WT (black bars) and A-ZIP<sup>tg/+</sup> (grey bars) mice. Mean  $\pm$  SEM for 6 mice per genotype. B-cells (CD19<sup>+</sup>); T-cells (CD3<sup>+</sup>); Gran (granulocyte, Gr1<sup>+</sup>CD11b<sup>+</sup>); Macs (macrophages, Gr1<sup>-</sup>CD11b<sup>+</sup>); Ebs (erythroblasts, CD71<sup>+</sup>Ter119<sup>+</sup>). **(C)** Representative FACS plots showing Sca-1 versus CD117 staining on lineage-negative BM (left panels), spleen (middle panels) and liver (right panels) cells from WT (upper panels) or *ob/ob* mice (lower panels). The red frames on the left and right of each plot indicate the numbers of LK (Lineage-negative, Sca-1<sup>-</sup>CD117<sup>+</sup>) and LSK (Lineage-negative, Sca-1<sup>+</sup>CD117<sup>+</sup>) cells, respectively, as a percentage of lineage-negative cells from each organ. **(D)** Histograms showing the total numbers of LSK (top panel) and LK (bottom panel) cells in the BM, spleen and liver of WT (upper panels) or *ob/ob* mice. Data are mean  $\pm$  SEM from 3 mice per genotype.

All significant p values are indicated above the corresponding bars.

## Supplementary Tables

**Sup. Table S1. Monoclonal antibody conjugates and reagents as well as polyclonal secondary antibodies.**

| Antigen            | Clone        | Conjugates                   | Supplier                  |
|--------------------|--------------|------------------------------|---------------------------|
| B220               | RA3-6B2      | PE-Texas Red                 | Pharmingen (1)            |
| B220               | RA3-6B2      | APC-eFluoro 780              | eBioscience (1)           |
| B220               | RA3-6B2      | -                            | In house (2)              |
| CD3                | 145-2C11     | -                            | In house, eBioscience (2) |
| CD4                | RM4-5        | PE-Cy7<br>APC-eFluoro 780    | eBioscience (1)           |
| CD8a               | 53.6.7       | Alexa 647                    | LICR (1)                  |
| CD8a               | 53.6.7       | APC-eFluoro 780              | eBioscience (1)           |
| CD11b              | M1/70        | Alexa 700<br>APC-eFluoro 780 | eBioscience (1)<br>(2)    |
| CD16/32            | 93           | PE                           | eBioscience (1)           |
| CD19               | 1D3          | PE Cy7                       | eBioscience (1)           |
| CD21               | 7GB          | FITC                         | BD Pharmingen (1)         |
| CD23               | B3B4         | PE                           | BD Pharmingen (1)         |
| CD25               | PC.61        | Pacific Blue                 | eBioscience (1)           |
| CD27               | A7R34        | FITC                         | eBioscience (1)           |
| CD34               | RAM34        | FITC                         | eBioscience (1)           |
| CD35               | 8C12         | -                            | In house, Biolegend (2)   |
| CD41               | MWReg30      | PE                           | eBioscience (1)           |
| CD43               | R2/60        | FITC                         | eBioscience (1)           |
| CD44               | IM781        | APC-eFluoro 780              | eBioscience (1)           |
| CD45.1             | A20          | PE Cy5                       | eBioscience (1)           |
| CD45.2             | 104          | eFluoro 450                  | eBioscience (1)           |
| CD48               | HM48.1       | Pacific Blue                 | Biolegend (1)             |
| CD71               | R17 217.1.4  | FITC                         | eBioscience (1)           |
| CD93               | AA4.1        | APC                          | eBioscience (1)           |
| CD117              | 2B8          | PerCp Cy5.5                  | eBioscience (1)           |
| CD127              | LG.7F9       | Biotin                       | eBioscience (1)           |
| CD135              | A2F10        | Alexa 647                    | eBioscience (1)           |
| CD150              | TC15-12F12.2 | PE Cy5                       | Biolegend (1)             |
| CD161              | PK136        | FITC                         | eBioscience (1)           |
| BP1                | 6C3          | PE                           | eBioscience (1)           |
| BP3                | BP-3.4       | biotin                       | In house (2)              |
| F4/80              | F4/80        | -                            | In house (2)              |
| Gr1                | RB6-8C5      | Pacific Orange               | Life Technologies (1)     |
| Gr1                | RB6-8C5      | APC-eFluoro 780              | eBioscience (1)           |
| IgD                | polyclonal   | -                            | GeneTex (2)               |
| IgM                | eB121-15F9   | PerCp Cy5.5                  | eBioscience (1)           |
| Laminin            | polyclonal   | -                            | Sigma (2)                 |
| Sca-1              | D7           | PE Cy7                       | eBioscience (1)           |
| TCR $\beta$        | H57          | PE                           | eBioscience (1)           |
| TCR $\gamma\delta$ | GL3          | PE-Cy5                       | eBioscience (1)           |
| Ter-119            | TER-119      | APC-eFluoro 780              | eBioscience (1)           |
| Streptavidin       | -            | Alexa 488                    | Molecular Probes (2)      |
| DAPI               |              |                              | Invitrogen (1)            |

| <b>Secondary antibodies to:</b> | <b>source</b> | <b>conjugates</b> | <b>Supplier</b>            |
|---------------------------------|---------------|-------------------|----------------------------|
| Sheep IgG                       | Donkey        | Alexa 488         | Jackson Immunoresearch (2) |
| Rat IgG                         | Donkey        | Alexa 647, Cy3    | Jackson Immunoresearch (2) |
| Rabbit IgG                      | Donkey        | Alexa 647         | Invitrogen (2)             |
| Armenian hamster                | Goat          | biotin            | Jackson Immunoresearch (2) |

Monoclonal antibody conjugates used for flow cytometry (1) and for Immunohistochemistry (2). Antigen designation, clone name, conjugate used and supplier are listed for all monoclonal antibodies used.

**Sup. Table S2. Primers used for q-RT-PCR analyses.**

| <b>Gene</b>      | <b>Fwd</b>              | <b>Rev</b>             |
|------------------|-------------------------|------------------------|
| <i>Gata1</i>     | CAGAACCGGCCTCTCATCC     | TAGTGCATTGGGTGCCTGC    |
| <i>Gata2</i>     | TAGTGCATTGGGTGCCTGC     | AGGTGGTGGTTGTCGTCTGA   |
| <i>Pu1</i>       | AGAAGCTGATGGCTTGGAGC    | GCGAATCTTTTCTTGCTGCC   |
| <i>Cxcl12</i>    | CGC TCT GCA TCA GTG ACG | TGAAGGGCACAGTTTGGAG    |
| <i>Cxcr4</i>     | ATGGAACCGATCAGTGTGAG    | GATGAAGTAGATGGTGGGCAG  |
| <i>Resistin</i>  | GGCTTAAATTGCTGGACAGTC   | TCTATCCTTGCACACTGGC    |
| <i>Slpr1</i>     | AGCCCTCTCGGACCTATTAG    | AGCCCTCTCGGACCTATTAG   |
| <i>Slpr2</i>     | TGGCTGATATCGCTGATT CTG  | GCCAGTAAGATGACGGAGAAG  |
| <i>Slpr3</i>     | GGAGGGCAGTATGTTTCGTAG   | AGCACATCCCAATCAGAAGG   |
| <i>Pth1r</i>     | CCCCGAGTCTAAAGAGAACAAG  | GTAATCGGGACAAGGTAAGTGC |
| <i>Actb</i>      | CTAAGGCCAACCGTGAAAAGAT  | CACAGCCTGGATGGCTACGT   |
| <i>Pparg del</i> | AAGAGCTGACCCAATGGTTG    | GCATCCTTACAAGCATGAA    |

**Sup. Table S3. Colony Forming Cell (CFC) assay shows EMH occurring in the spleen.**

|                                              |             | <b>CFU-<br/>GEMM</b> | <b>CFU-<br/>GM</b> | <b>CFU-M</b> | <b>CFU-G</b> | <b>BFU-E</b> |
|----------------------------------------------|-------------|----------------------|--------------------|--------------|--------------|--------------|
| <b>BM</b>                                    | <b>mean</b> | <b>0</b>             | <b>9</b>           | <b>11</b>    | <b>5</b>     | <b>1</b>     |
| <b>(CTL)</b>                                 | <b>SEM</b>  | <i>0</i>             | <i>0.88</i>        | <i>1.45</i>  | <i>1.20</i>  | <i>0.58</i>  |
| <b>BM</b>                                    | <b>mean</b> | <b>0</b>             | <b>14</b>          | <b>11</b>    | <b>11</b>    | <b>4</b>     |
| <b>(<math>\gamma^{\Delta/\Delta}</math>)</b> | <b>SEM</b>  | <i>0</i>             | <i>0.88</i>        | <i>2.60</i>  | <i>1.33</i>  | <i>0.88</i>  |
| <b>spleen</b>                                | <b>mean</b> | <b>1</b>             | <b>3</b>           | <b>6</b>     | <b>3</b>     | <b>5</b>     |
| <b>(CTL)</b>                                 | <b>SEM</b>  | <i>0.33</i>          | <i>0.88</i>        | <i>0.88</i>  | <i>1.00</i>  | <i>1.45</i>  |
| <b>spleen</b>                                | <b>mean</b> | <b>5</b>             | <b>28</b>          | <b>36</b>    | <b>39</b>    | <b>16</b>    |
| <b>(<math>\gamma^{\Delta/\Delta}</math>)</b> | <b>SEM</b>  | <i>1.20</i>          | <i>4.91</i>        | <i>5.46</i>  | <i>6.33</i>  | <i>3.00</i>  |

CFC assays were performed in triplicate on BM (top 2 lanes) and spleen (bottom 2 lanes) progenitors. Splenocytes ( $3 \times 10^5$ ) and BM cells ( $2 \times 10^4$ ) cells per dish. Colonies were counted 10-12 days after seeding. Numbers correspond to the number of colonies per 35mm dishes. CFU (colony forming unit); CFU-G (CFU-granulocyte); CFU-M (CFU-macrophage); CFU-GM (CFU-granulocyte/macrophage); CFU-GMME (CFU-granulocyte/macrophage/megakaryocyte/erythroid); Burst forming unit (BFU)-erythroid.
